# Supplementary material
Source: publisher site journal article supplement (https://www.spandidos-publications.com/750/downloadSupplementary)

Figure S1. Heatmap and plate layout indicating mRNA expression in GC1415 cells exposed to auto-TMV of genes engaged in (A) metastasis, (B) angiogenesis and (C) human oncogenes and suppressor genes. Unaffected genes are presented in a grey color (n=2).

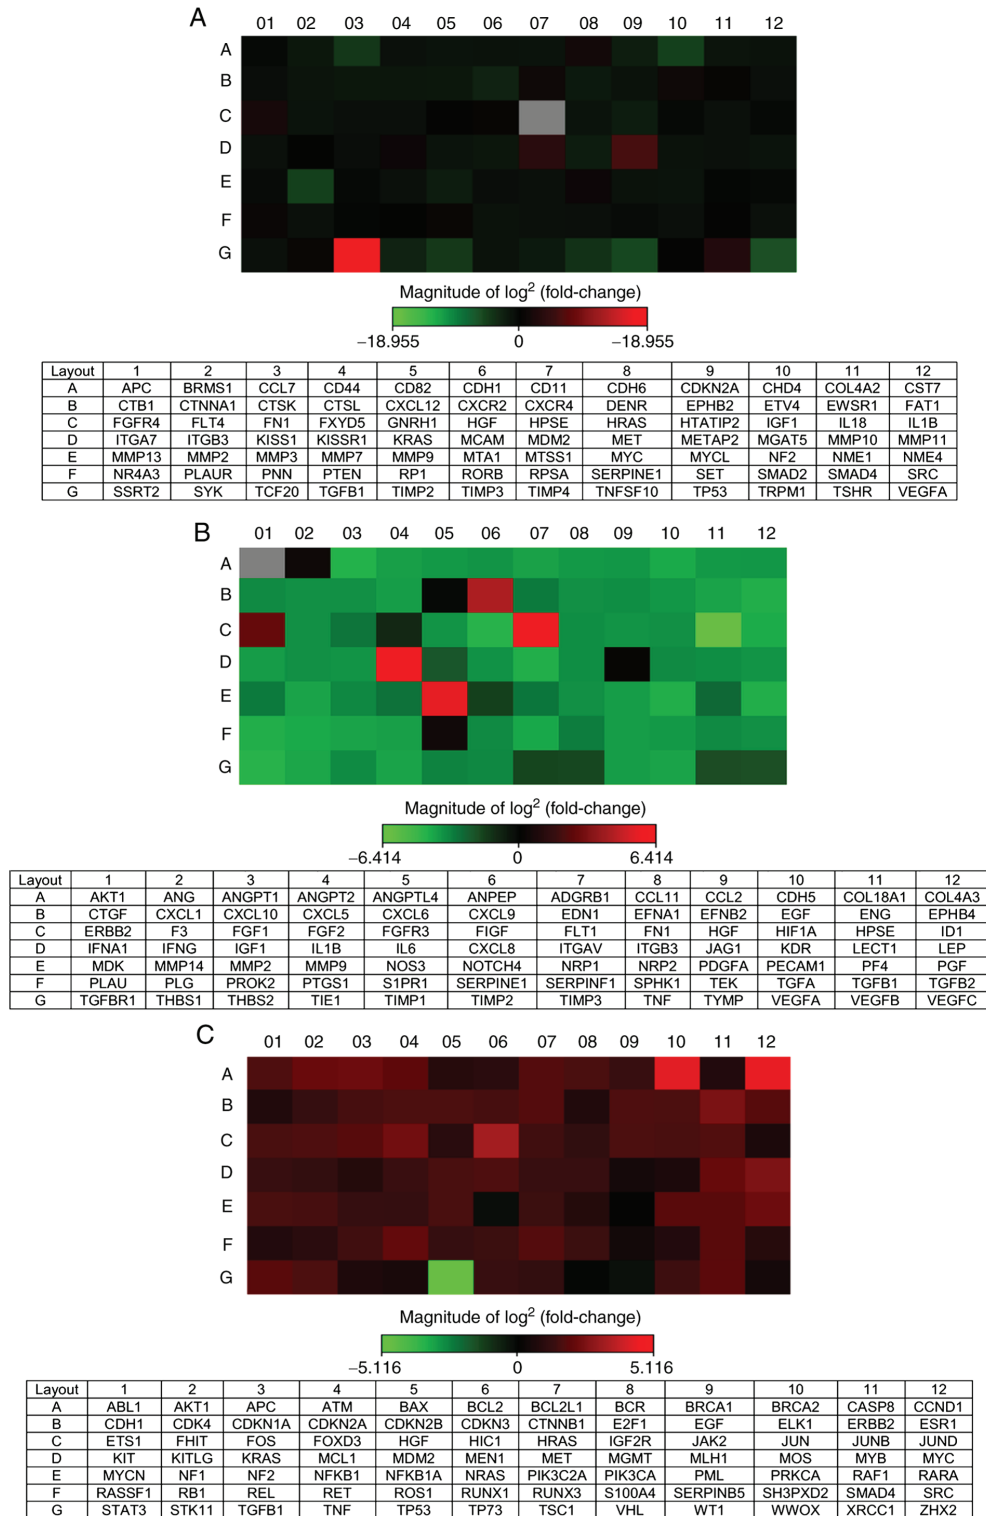

Supplement: Supplementary file 1 [file downloadSupplementary]
